# Supplementary material for: Yttria stabilized zirconia derived from metal–organic frameworks
Source: Royal Society of Chemistry journal article supplement (doi:10.1039/c4ra14728f), 2015-01-01
Supplement: c4ra14728f1.pdf [file c4ra14728f1.pdf]

## Supplementary Information

### Yttria stabilized zirconia derived from metal-organic frameworks

Zifeng Yue, Shucheng Liu, and Yi Liu\*

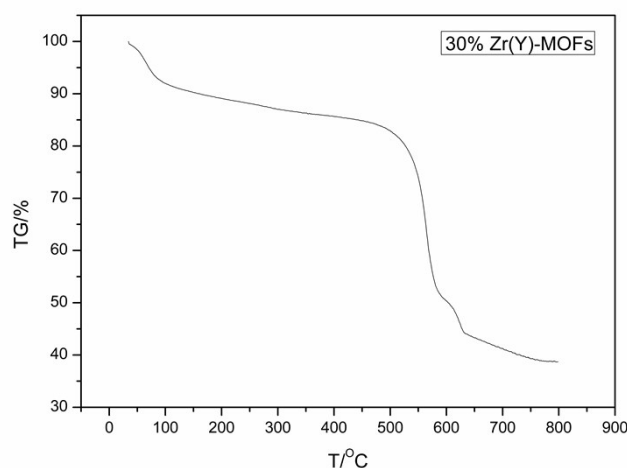

Fig. S1 TG curve of MOFs

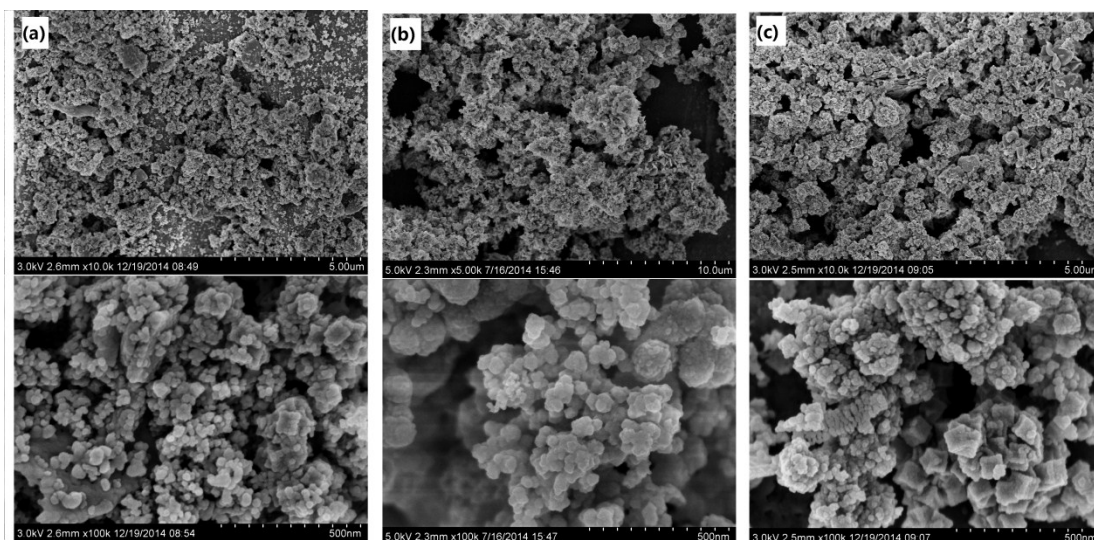

Fig. S2 SEM images of samples: (a)8YSZ; (b)30YSZ; (c)50YSZ

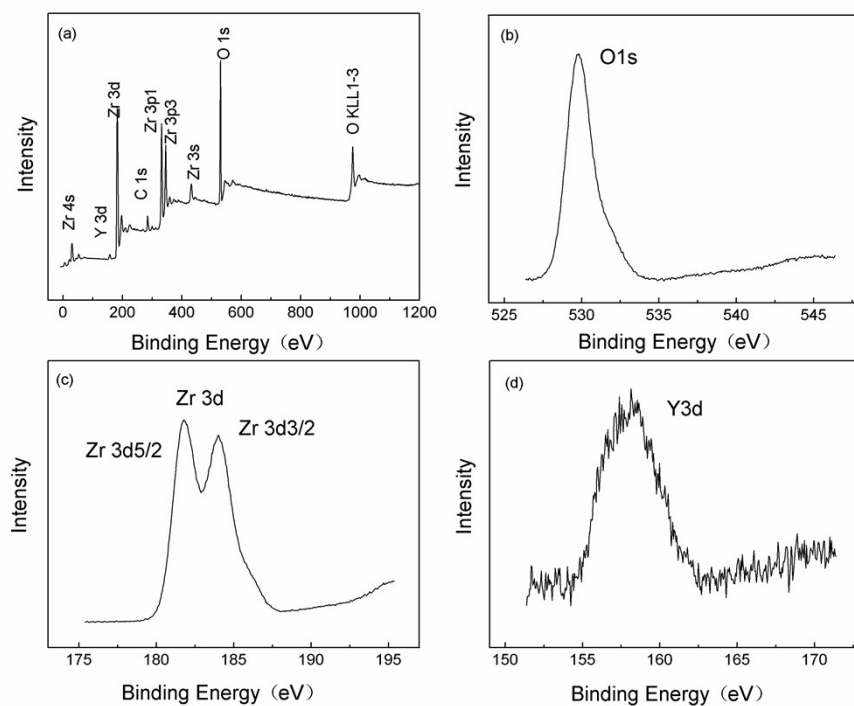

Fig. S3 XPS of 8YSZ

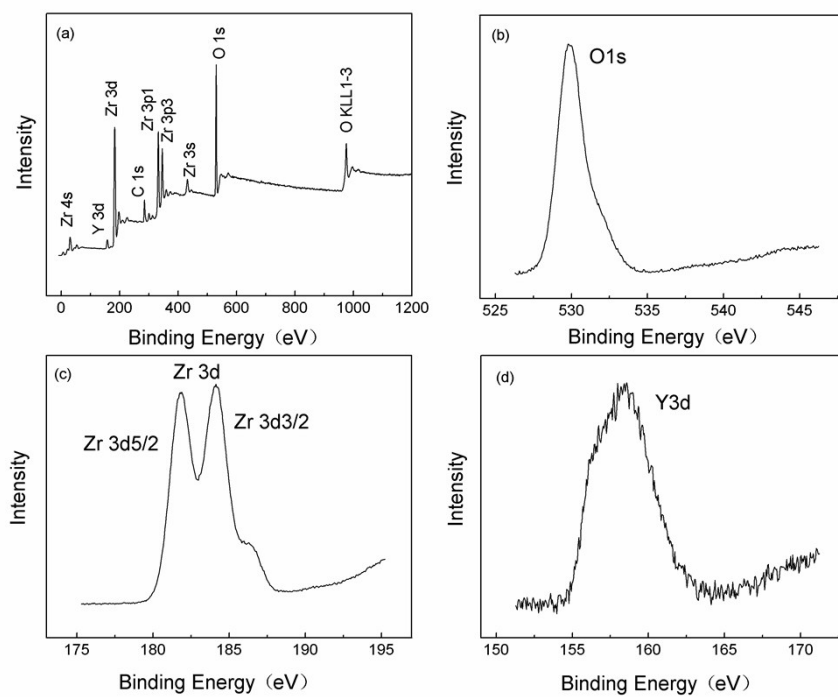

Fig. S4 XPS of 30YSZ

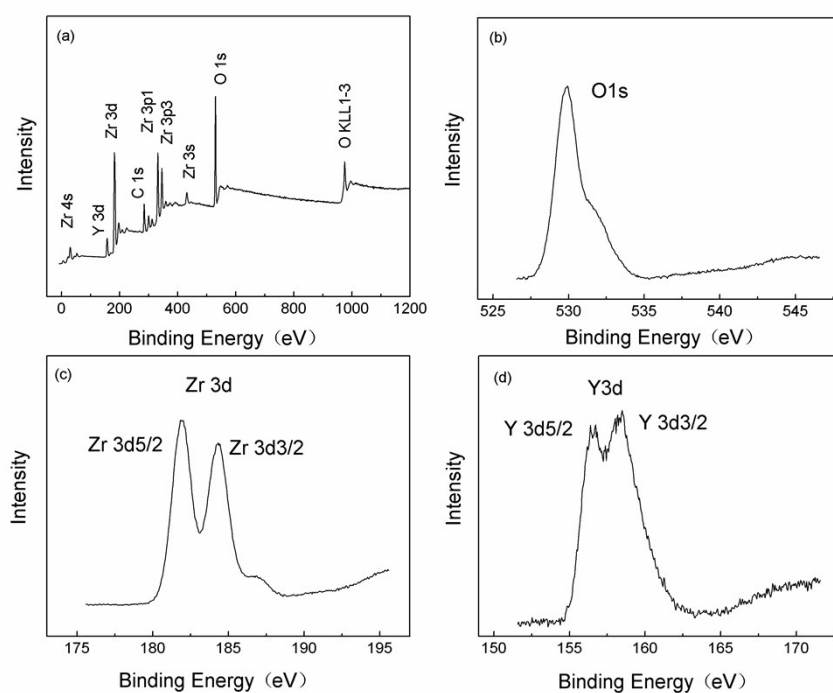

Fig. S5 XPS of 50YSZ

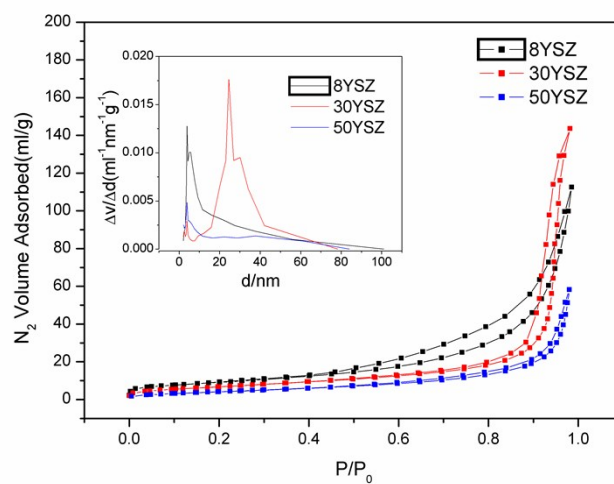

Fig. S6 Nitrogen adsorption-desorption isotherms and pore size distribution curves  
(inset) of YSZ
